# Supplementary material for: A thermo-, near-infrared light- and water-induced shape memory polymer with healing fatigued shape memory performance
Source: Royal Society of Chemistry journal article supplement (doi:10.1039/d2qm00041e), 2022-01-01
Supplement: d2qm00041e1.pdf [file d2qm00041e1.pdf]

## Supporting Information

### Thermo-, near-infrared light and water-induced shape memory polymer with healing fatigued shape memory performance

Yongkang Bai <sup>a,b</sup>, Leonid Ionov <sup>b,\*</sup>

a. School of Chemical Engineering and Technology, Shaanxi Key Laboratory of Energy Chemical Process Intensification, Institute of Polymer Science in Chemical Engineering, Xi'an Jiaotong University, Xi'an, Shaanxi 710049, PR China;

b. Faculty of Engineering Sciences and Bavarian, Polymer Institute, University of Bayreuth, 95447 Bayreuth, Germany;

Corresponding Author: Leonid Ionov, [leonid.ionov@uni-bayreuth.de](mailto:leonid.ionov@uni-bayreuth.de)

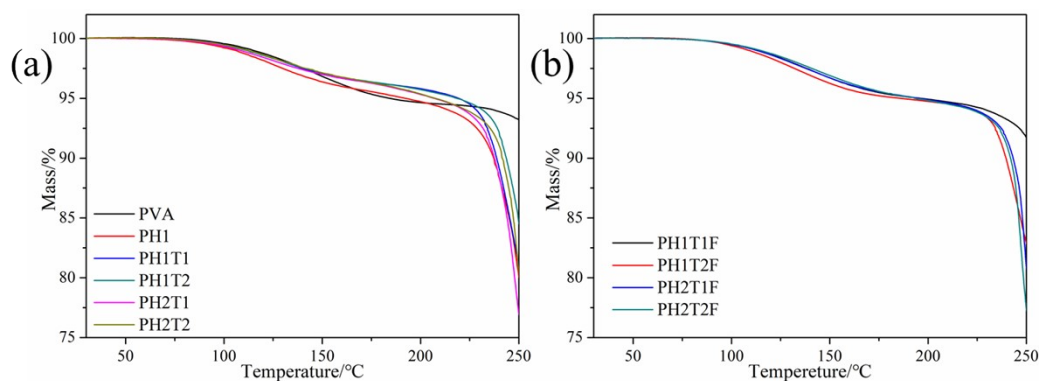

Figure S1 TGA curves PVA and PVA based SMPs

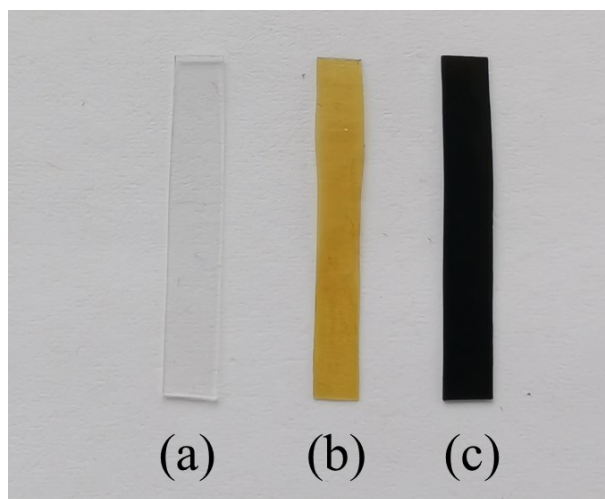

Figure S2 Optical picture of (a) PH1, (b) PH1T1 and (c) PH1T1F

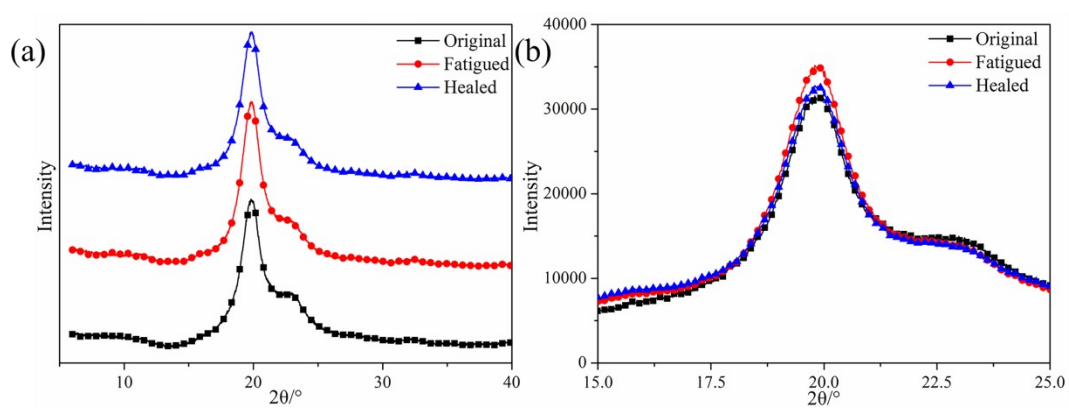

Figure S3 (a) and (b) XRD patterns of original, fatigued and healed PH2T1F

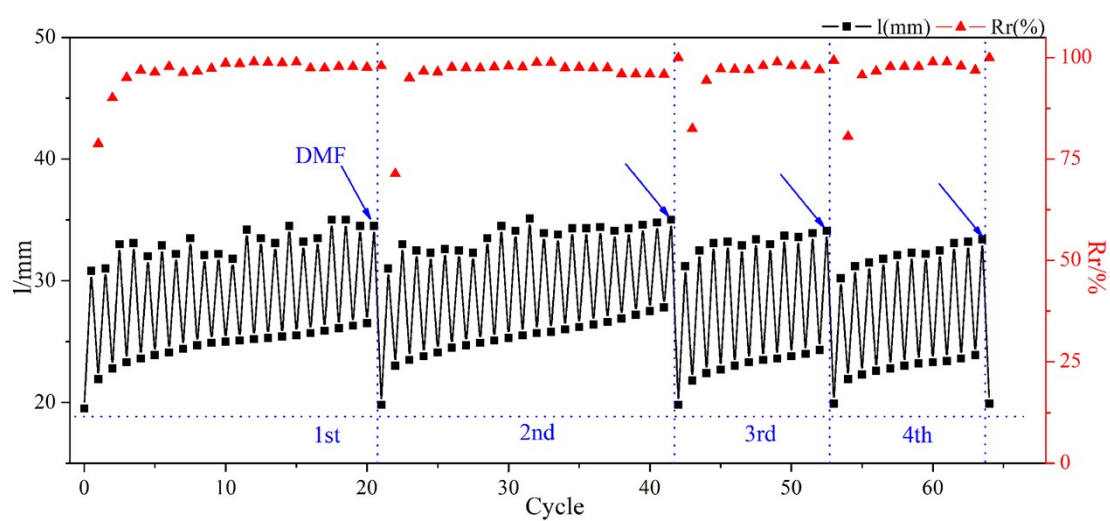

Figure S4 Fatigue-healing behavior of cross-linked EVOH
